# Supplementary material
Source: PubMed Central journal article supplement (PMC7840706)
Supplement: ajcr0011-0171-f7.pdf [file ajcr0011-0171-f7.pdf]

## THZ1 induces cytotoxicity in UC

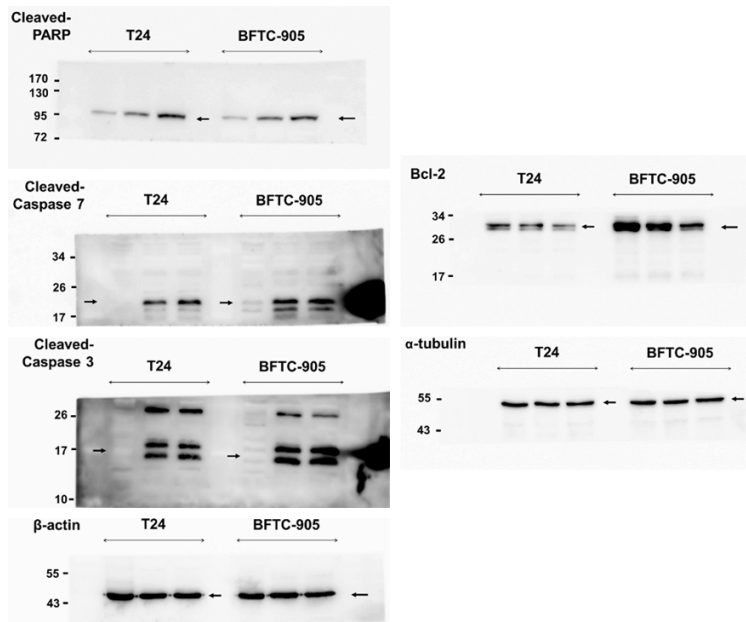

**Figure S1.** Full-length gels and blots corresponding to Figure 2C, 2D. Molecular weight (kDa) has been shown in the left panel.

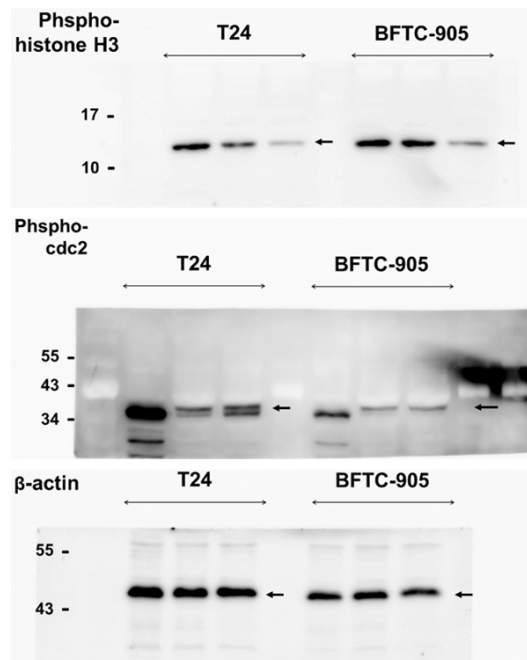

**Figure S2.** Full-length gels and blots corresponding to Figure 3B. Molecular weight (kDa) has been shown in the left panel.

# THZ1 induces cytotoxicity in UC

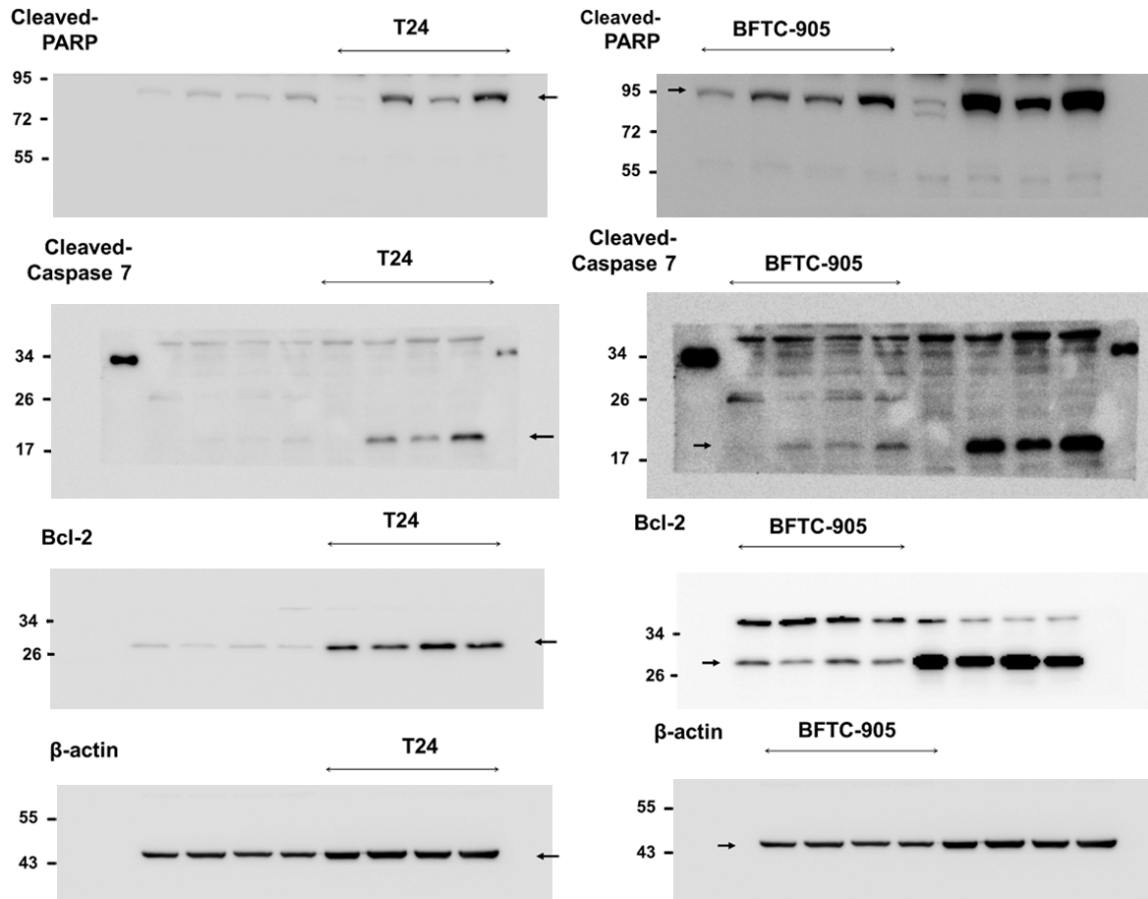

**Figure S3.** Full-length gels and blots corresponding to Figure 4C, 4D. Molecular weight (kDa) has been shown in the left panel.
